# Supplementary material for: Exploring the inner environment of protein hydrogels with fluorescence spectroscopy towards understanding their drug delivery capabilities
Source: Royal Society of Chemistry journal article supplement (doi:10.1039/d0tb00818d), 2020-01-01
Supplement: d0tb00818d1.pdf [file d0tb00818d1.pdf]

**Supporting Information for**

**Exploring the inner environment of protein hydrogels with fluorescence spectroscopy toward understanding their drug delivery capabilities**

Ramesh Nandi,<sup>a</sup> Anna Yucknovsky,<sup>a</sup> Manuel M. Mazo,<sup>b</sup> and Nadav Amdursky<sup>a\*</sup>

<sup>a</sup>Schulich Faculty of Chemistry, Technion Israel Institute of Technology, Haifa-3200003, Israel;

<sup>b</sup>Cell Therapy Area, Clinica Universida de Navarra, Pamplona, Spain

\*Corresponding Author Email: [amdursky@technion.ac.il](mailto:amdursky@technion.ac.il)

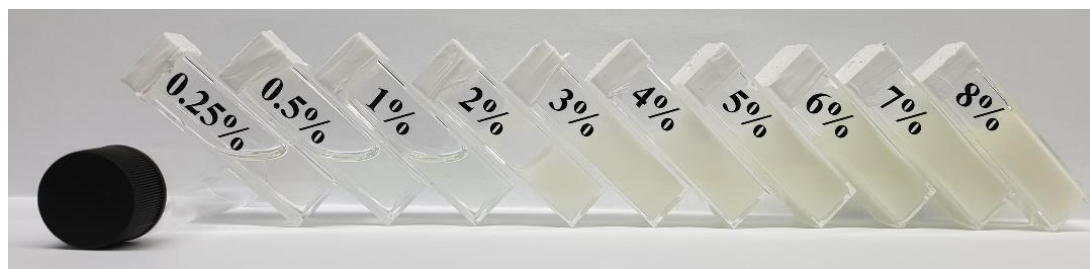

**Figure S1:** Images of different samples after gelation.

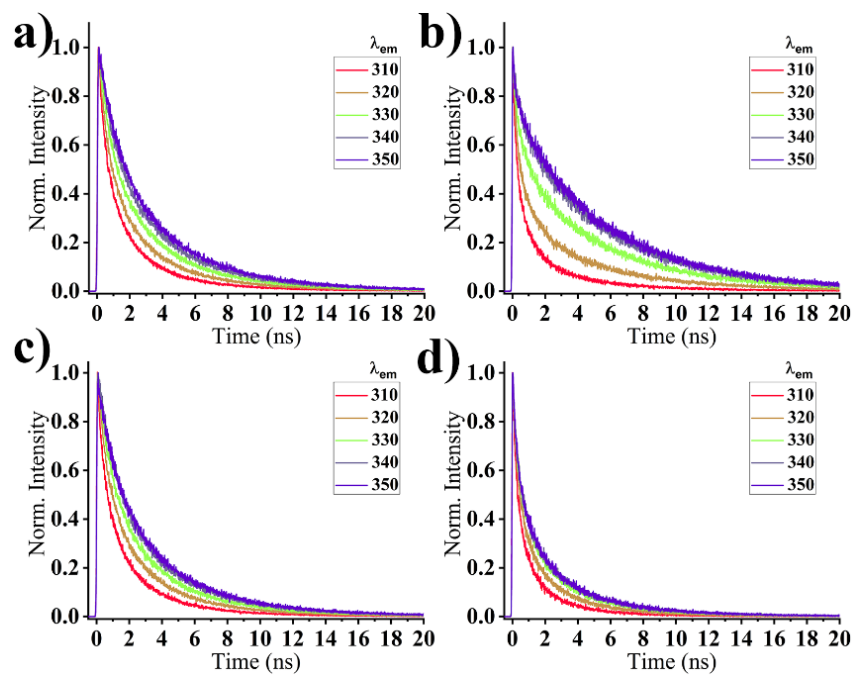

**Figure S2:** Wavelength dependent fluorescent transient decay of BSA solution before a) 0.25%, b) 8% and after gelation c) 0.25%, d) 8%.

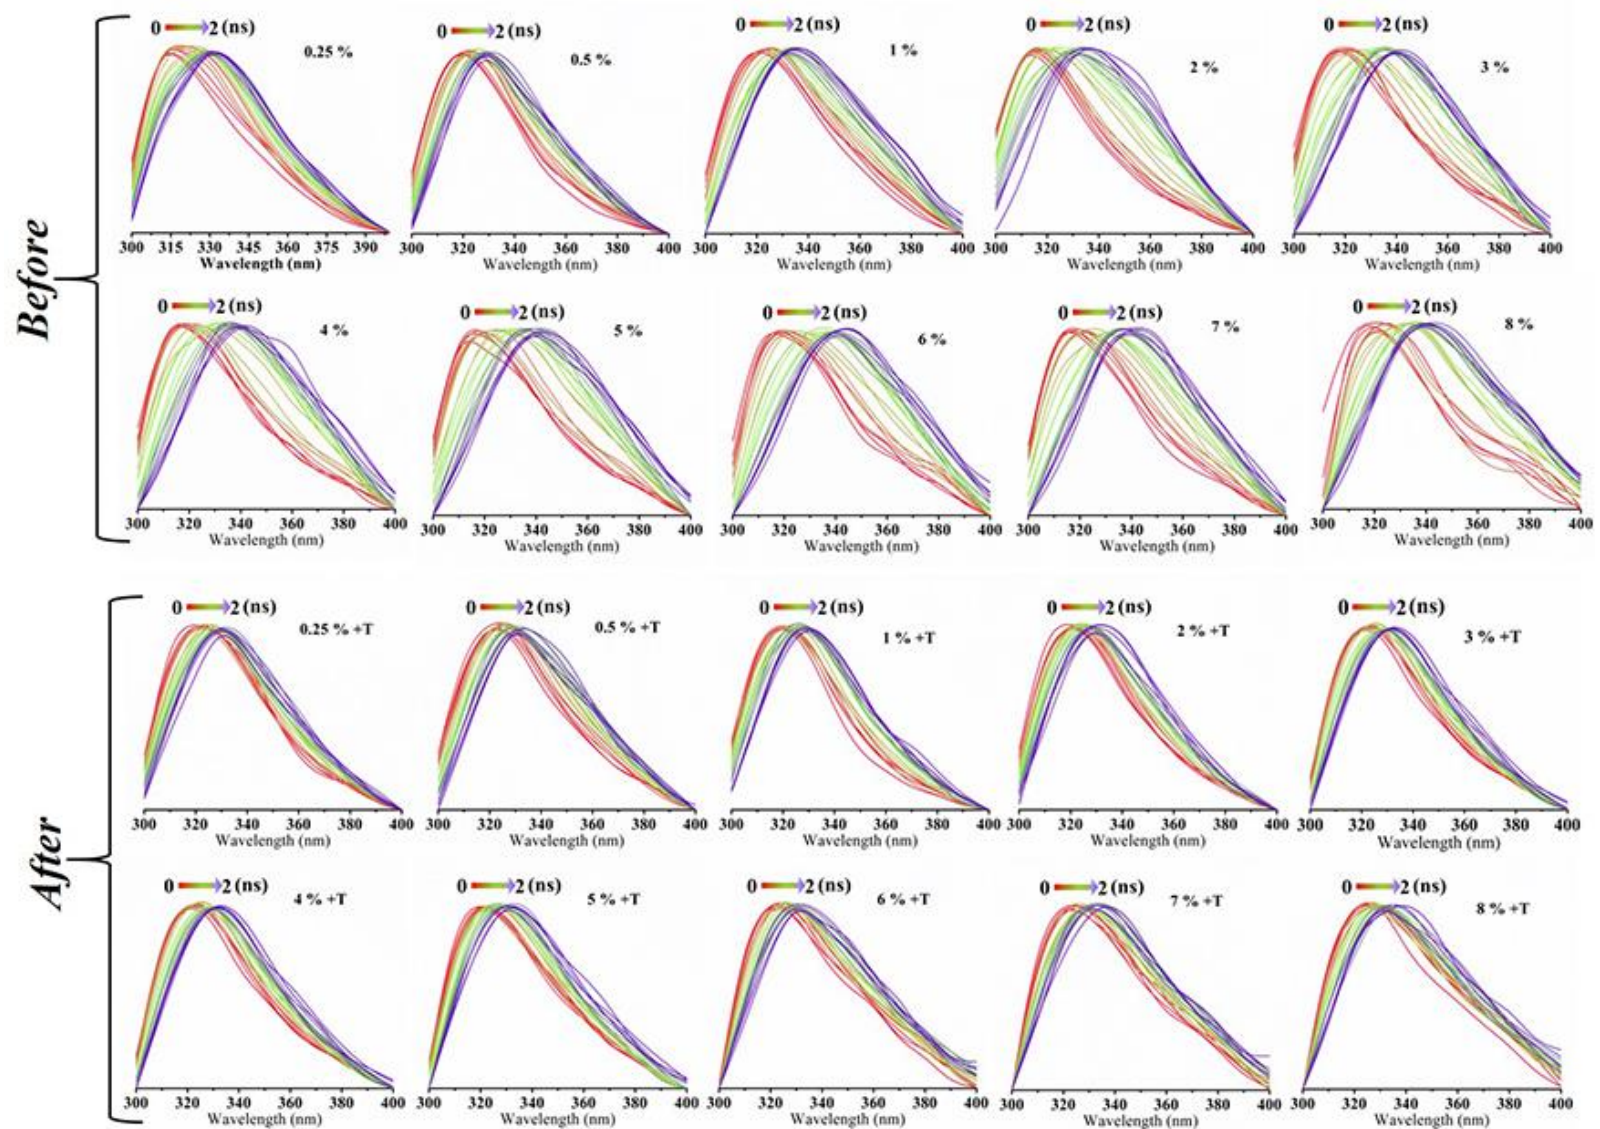

**Figure S3:** TRANES measurements for the first 2 ns of the emission decay of Trp for different weight percentage of BSA before and after thermal treatment.

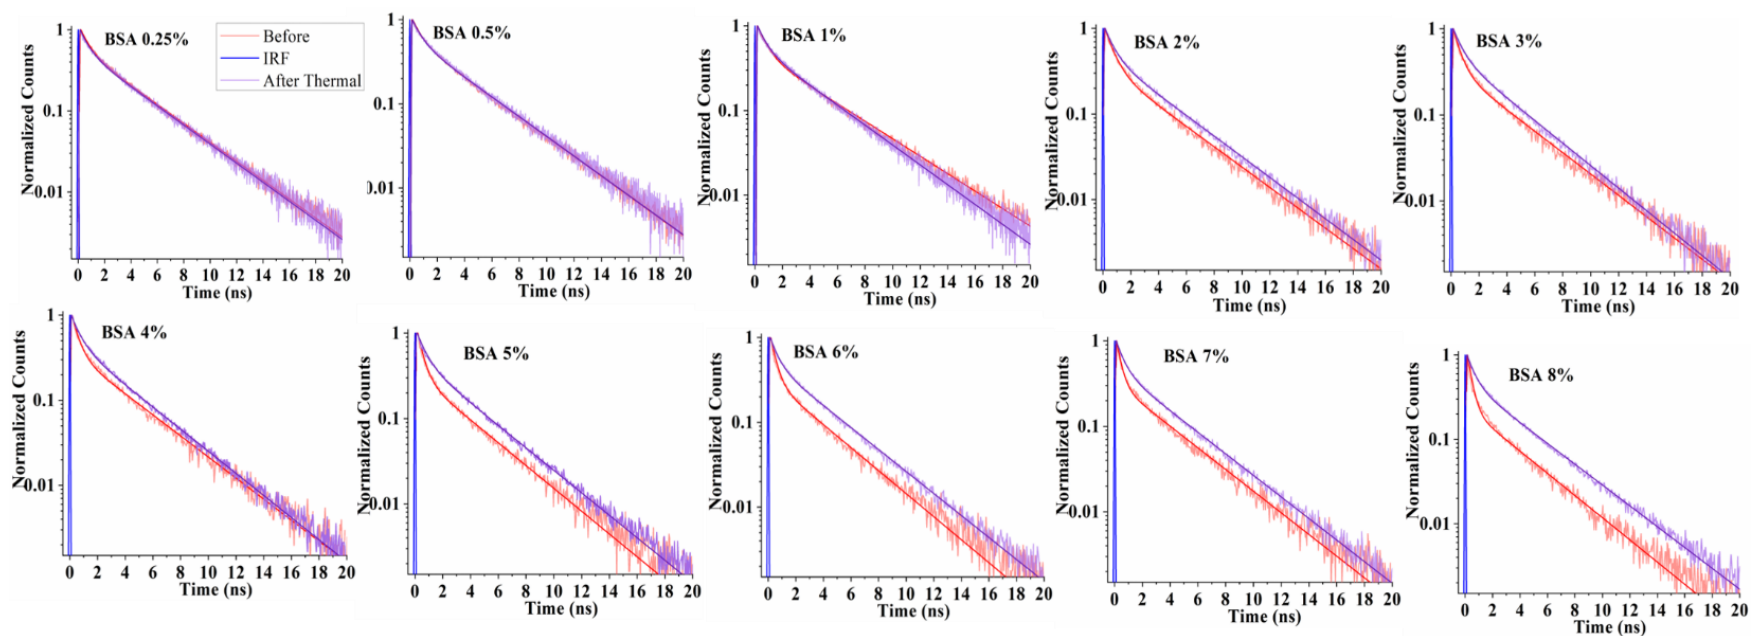

**Figure S4:** Two exponent fitted time resolved emission spectra of HPTS inside BSA (0.25 to 0.8% concentration) before and after thermal. Samples were excited at 390 nm and emission was monitored at 435 nm.

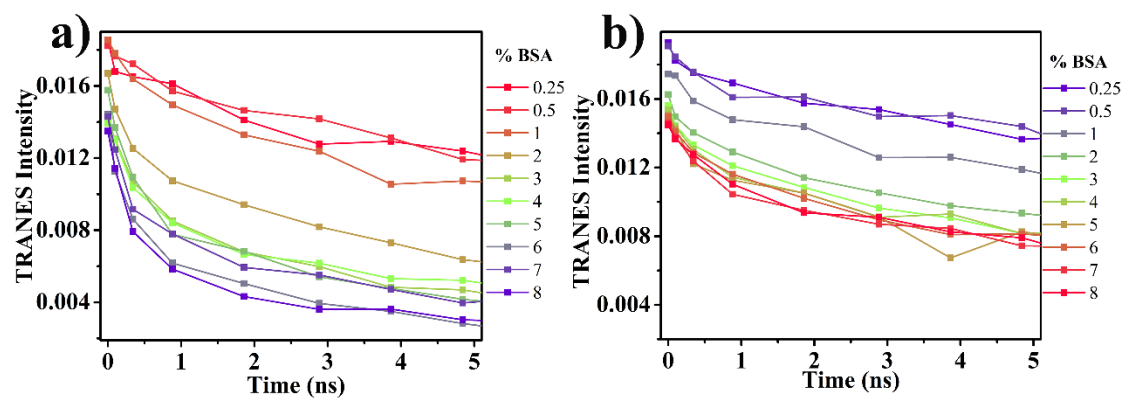

**Figure S5:** Change in ROH\* intensity with time a) before and b) after gelation, was evaluated from TRANES of each sample.

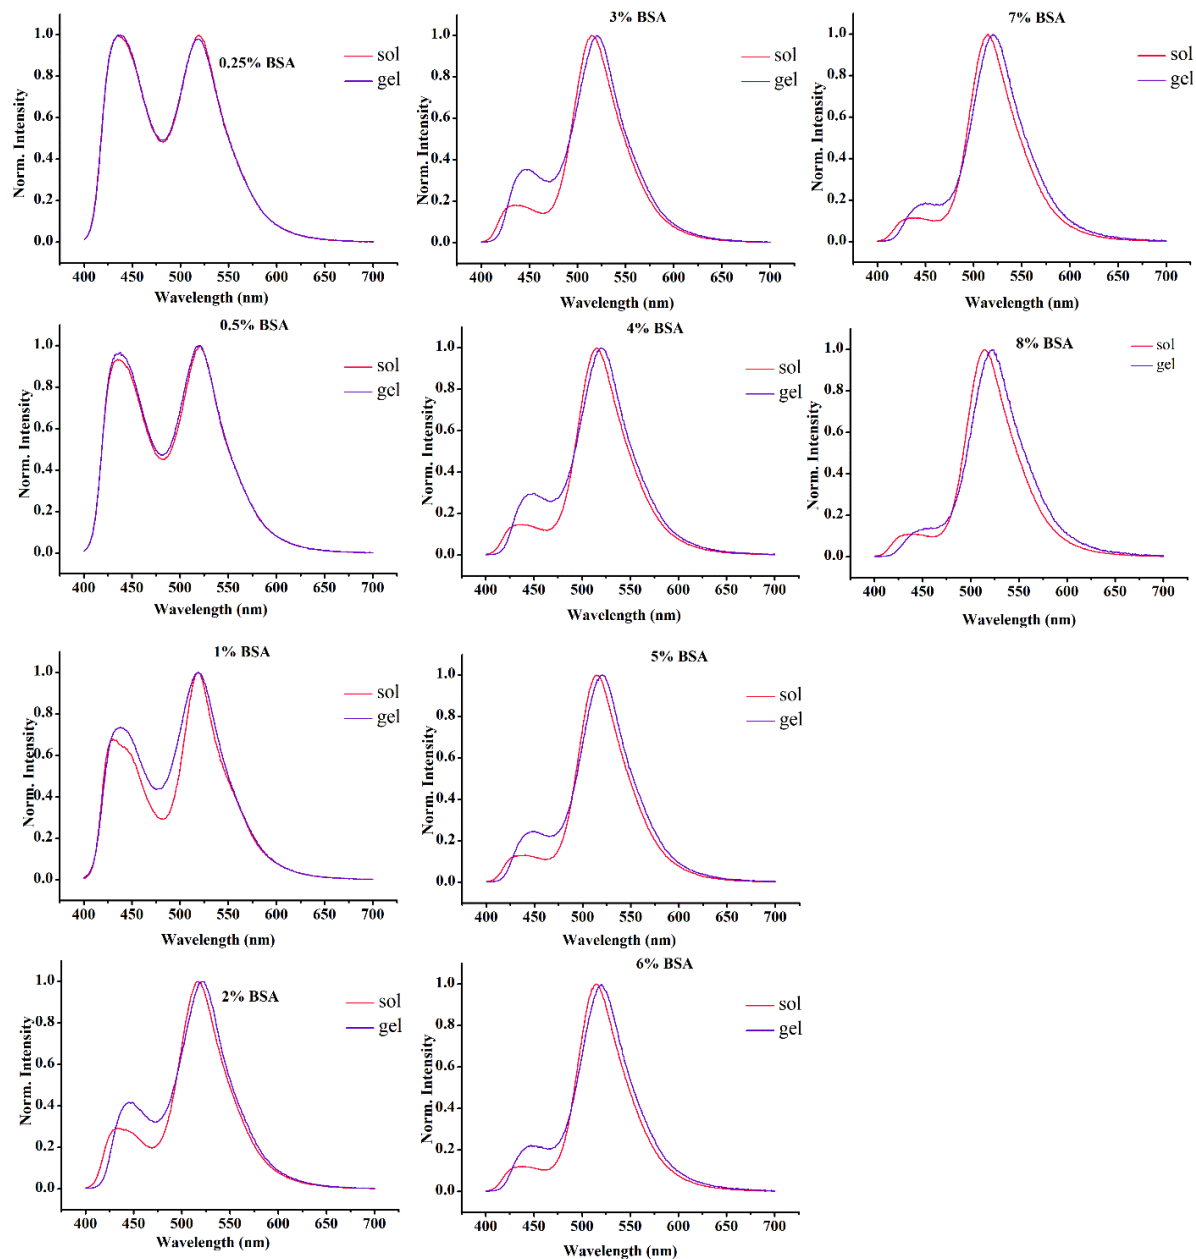

**Figure S6:** Steady state emission spectra of HPTS inside BSA before and after gelation normalized at RO<sup>-</sup> peak position.



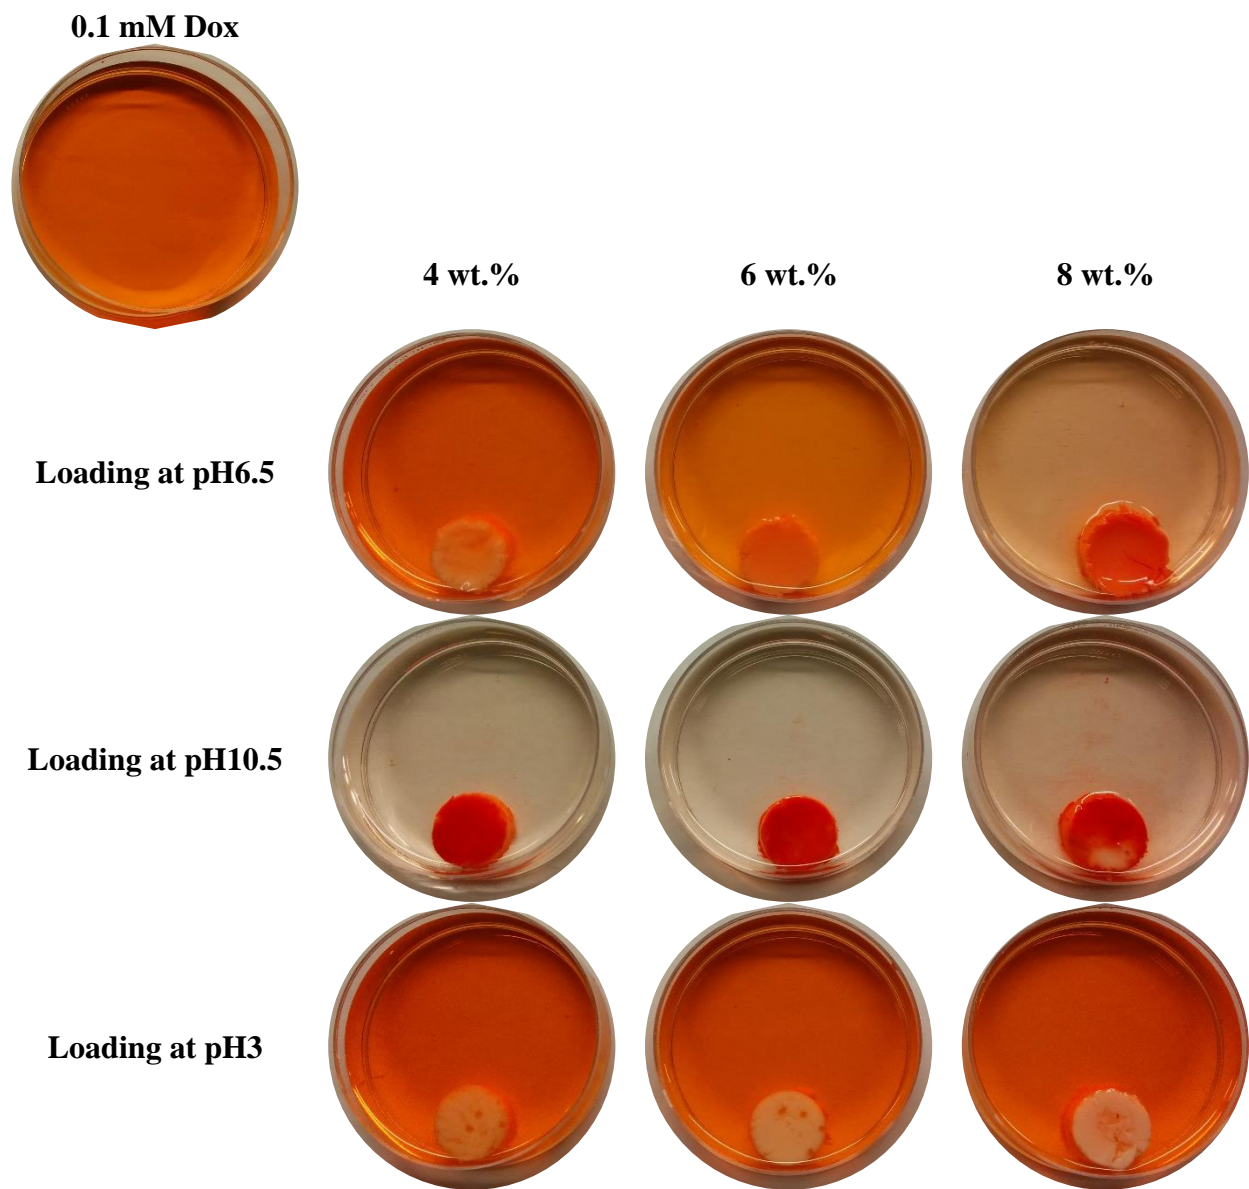

**Figure S7.** Images of the loading of Dox within BSA hydrogels at different weight concentrations and at different loading pH values, together with a picture of 0.1 mM Dox solution. The volume of the gels is 2 ml. The pictures were taken following 3 days of loading.

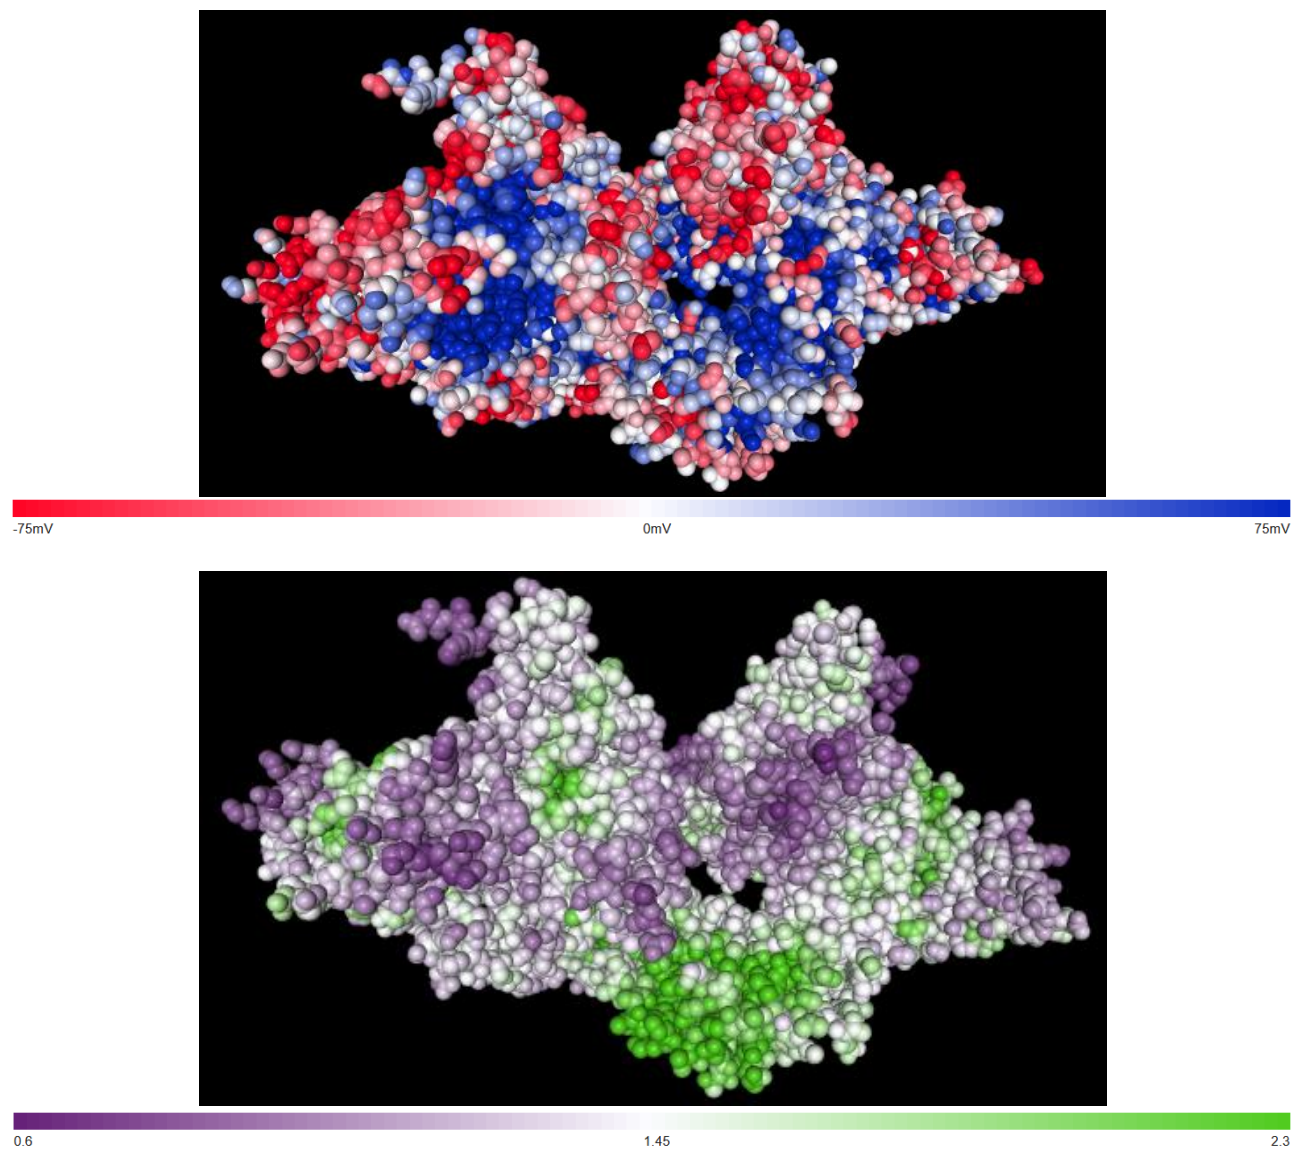

**Figure S8.** (a) Potential field and (b) non-polar/polar ratio (green is more hydrophobic and purple is more polar) of BSA (PDB ID: 4F5S). The maps were generated using Protein-Sol (M. Hebditch and J. Warwicker, *Sci. Rep.*, 2019, **9**, 1969).
